# Supplementary material for: Fluorometric detection of a chemical warfare agent mimic (DCP) using a simple hydroxybenzothiazole–diaminomaleonitrile based chemodosimeter
Source: Royal Society of Chemistry journal article supplement (doi:10.1039/d2nj04260f), 2022-11-15
Supplement: d2nj04260f1.pdf [file d2nj04260f1.pdf]

## **Supporting Information**

### **Fluorometric detection of a chemical warfare agent mimic (DCP) using a simple hydroxybenzthiazole-diaminomaleonitrile based chemodosimeter**

Manas kumar Das,<sup>a</sup> Tanushree Mishra,<sup>a</sup> Subhajit Guria,<sup>a</sup> Debojyoti Das,<sup>a</sup> Juheli Sadhukhan,<sup>a</sup> Sushmita Sarker,<sup>c</sup> Koushik Dutta,<sup>b</sup> Arghya Adhikary,<sup>c</sup> Dipankar Chattopadhyay,<sup>b</sup> Susanta Sekhar Adhikari,<sup>a</sup> \*

<sup>a</sup>Department of Chemistry, University of Calcutta, 92, A.P.C. Road, Kolkata 700 009, West Bengal, India.

<sup>b</sup>Centre for Research in Nanoscience & Nanotechnology, (CRNN), University of Calcutta, Technology Campus, Sector-III, Block-JD 2, Salt Lake, Kolkata 700098, West Bengal, India.

<sup>c</sup>Center for Research in Nanoscience and Nanotechnology, Technology Campus, University of Calcutta, JD-2, Sector-III, Salt Lake, Kolkata-700106, West Bengal, India

\* To whom correspondence should be addressed.

E-mail address: [adhikarisusanta@yahoo.com](mailto:adhikarisusanta@yahoo.com)

#### **1. General method of UV-Vis and fluorescence titration**

Path length of the cells used for absorption and emission studies was 1 cm. For UV-Vis and fluorescence titrations, stock solutions of the ligands were prepared in acetonitrile solvent. An appropriate amount of the ligands were pipetted in the cuvette so that the final volume of the ligand is 20  $\mu$ M in buffer solution. Fluorescence measurements were performed using 5 nm x 5 nm slit width.

#### **2. Buffer solution preparation**

Buffer solutions were prepared according to the literature procedure. All the buffer solutions that are used are shown below, and are freshly prepared prior to use. pH of the solutions was measured using a pH meter and adjusted with HCl or NaOH to the desired value.

|        |                                                                                 |
|--------|---------------------------------------------------------------------------------|
| pH 2   | KCl-HCl Buffer                                                                  |
| pH 4   | K <sub>2</sub> HPO <sub>4</sub> -HCl Buffer                                     |
| pH 6   | KH <sub>2</sub> PO <sub>4</sub> -NaOH Buffer                                    |
| pH 7.4 | Na <sub>2</sub> HPO <sub>4</sub> - KH <sub>2</sub> PO <sub>4</sub> -NaCl Buffer |
| pH 8   | KH <sub>2</sub> PO <sub>4</sub> -NaOH Buffer                                    |
| pH 10  | Glycine-NaOH Buffer                                                             |
| pH 12  | Na <sub>2</sub> HPO <sub>4</sub> - KH <sub>2</sub> PO <sub>4</sub> Buffer       |

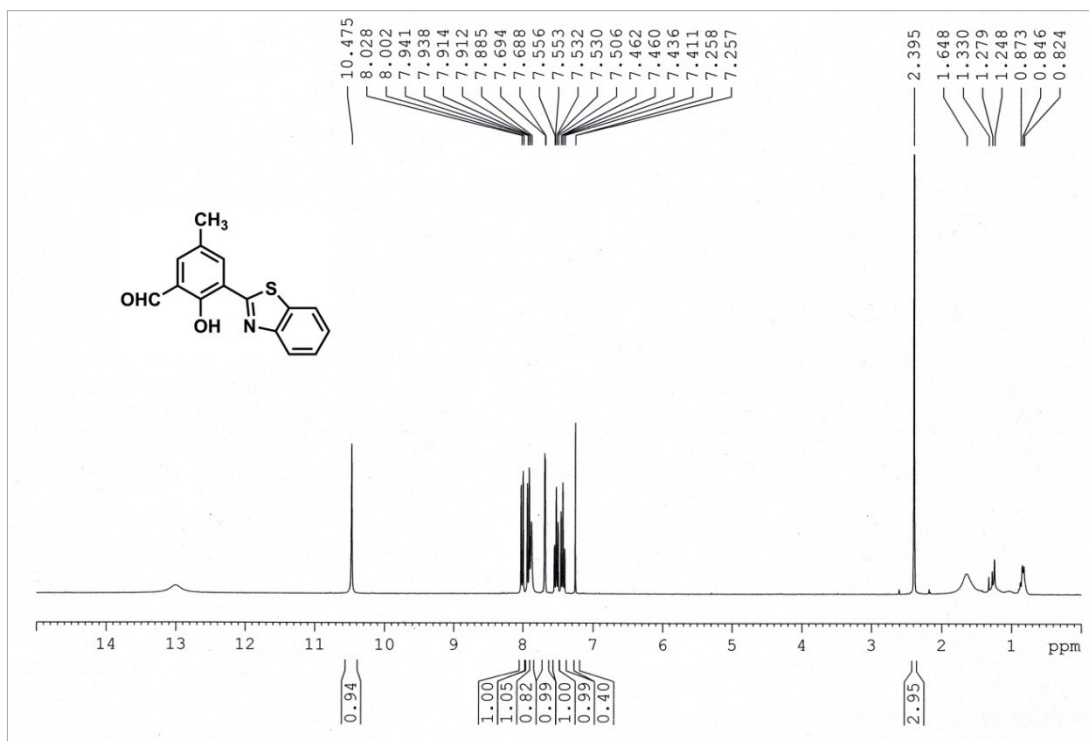

Figure S1:  $^1\text{H-NMR}$  (300 MHz) of compound BZ-CHO in  $\text{DMSO-}d_6$

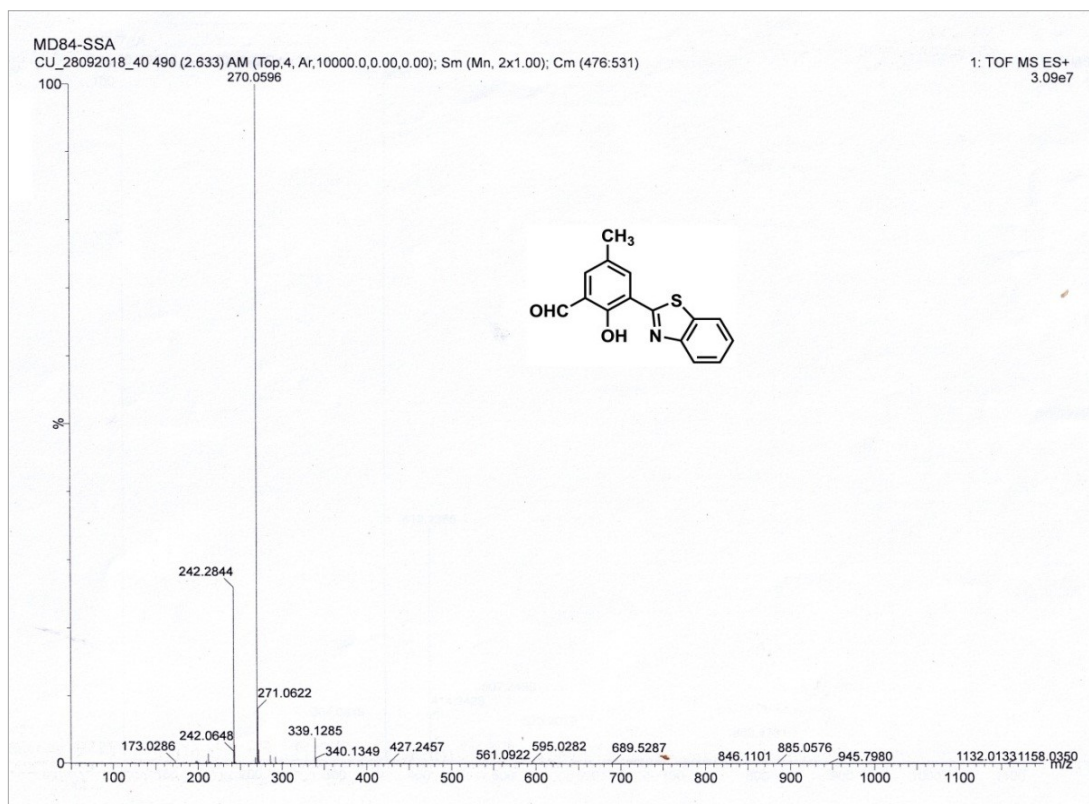

Figure S2: ESI-MS of compound BZ-CHO

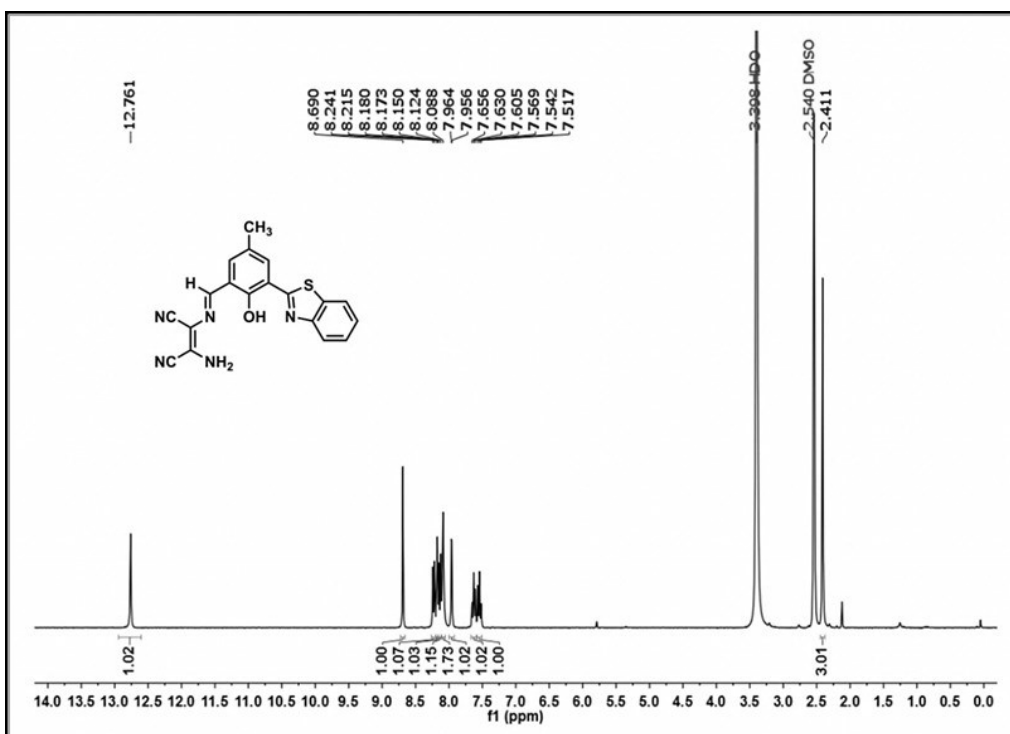

Figure S3:  $^1\text{H-NMR}$  (500 MHz) of compound **BZ-DAM** in  $\text{DMSO-}d_6$

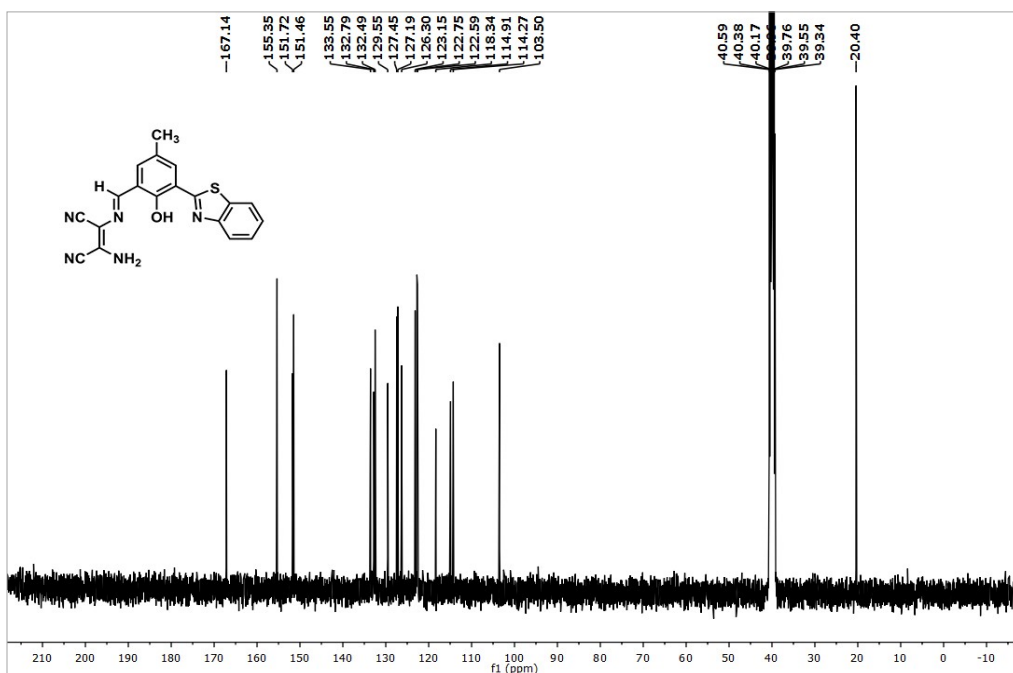

Figure S4:  $^{13}\text{C-NMR}$  (100 MHz) of compound **BZ-DAM** in  $\text{DMSO-}d_6$

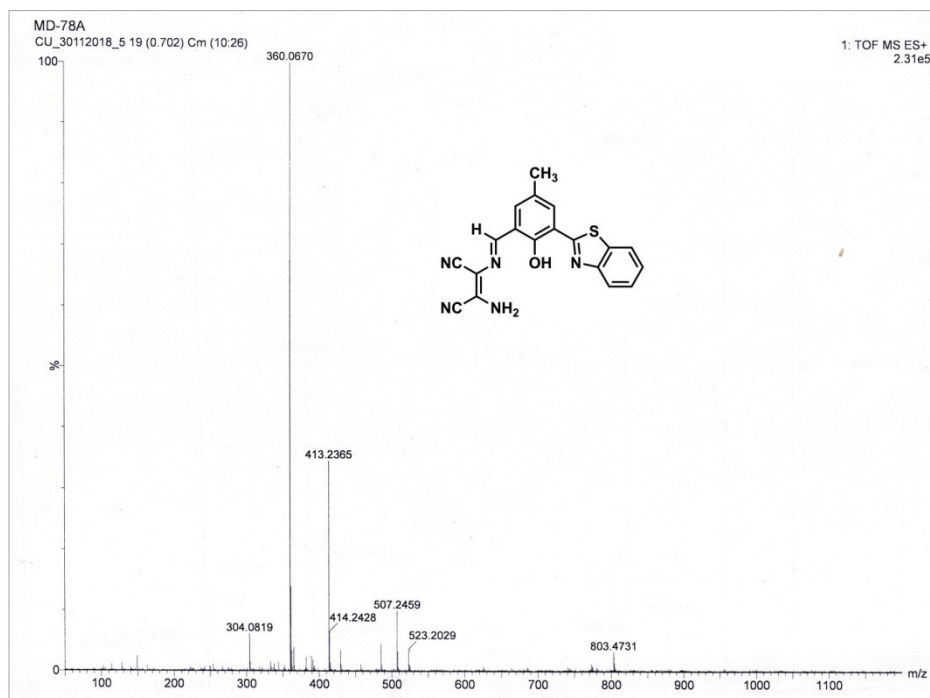

Figure S5: ESI-MS of compound BZ-DAM

Table S1: A comparison table for DCP probes

| Structure of fluorescence probe                                      | Nature of Fluorescence              | Journal                                        | Solvent system                      | Mechanism                        | LOD        |
|----------------------------------------------------------------------|-------------------------------------|------------------------------------------------|-------------------------------------|----------------------------------|------------|
| <br><chem>O=[N+]([O-])c1ccc(cc1)NN=C2C(=C(C#N)C(=O)C2(C)C</chem>     | No fluorescence, only colour change | ACS Omega <b>2022</b> , 7, 5595–5604           | CH <sub>3</sub> CN                  | Deprotonation, Quinoid formation | 25–200 ppm |
| <br><chem>c1ccc(cc1)N(c2ccccc2)c3ccc(cc3)C=C4C(=N5C=CC=C5S4)N</chem> | Fluorescence enhancement And ICT    | OBC, <b>2022</b> , 20, 4803–4814               | THF:H <sub>2</sub> O (9:1)          | Hydrolysis                       | 35.6 nM    |
| <br><chem>CN(C)C1=CC=C(C=C1)/C=C/C(=O)/C=C/C2=CC=C(C=C2)N(C)C</chem> | Fluorescence quenching              | J. Mater. Chem. C, <b>2022</b> , 10, 5458–5465 | CH <sub>3</sub> CN-H <sub>2</sub> O | Phosphamide formation            | 0.9 ppb    |

|                                                                                     |                                          |                                                      |                                          |                                    |        |
|-------------------------------------------------------------------------------------|------------------------------------------|------------------------------------------------------|------------------------------------------|------------------------------------|--------|
| 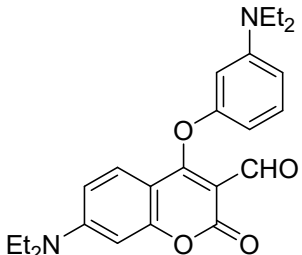   | Fluorescence turns on and enhancement    | ACS Appl. Bio. Mater. <b>2021</b> , 4, 7007-7015     | DMSO                                     | Cyclization                        | 6.9 nM |
|    | Fluorescence turns on and enhancement    | J. Org. Chem. <b>2021</b> , 86, 14663–14671          | H <sub>2</sub> O                         | Phosphamide formation              | 35 ppb |
|   | Fluorescence switches on and enhancement | Dyes and pigments, <b>2021</b> , 189, 109257         | CH <sub>3</sub> CN                       | Phosphamide formation, PET process | 35 nM  |
|  | Fluorescence switches on and enhancement | Spectrochimica Acta Part A <b>2021</b> , 263, 120206 | CH <sub>3</sub> CN:H <sub>2</sub> O(2:8) | Phosphorylation,                   | 68 nM  |
|  | Enhancement of fluorescence              | New J. Chem., <b>2020</b> , 44, 10713-10718          | DMF                                      | Phosphamide formation              | 5.5 nM |
|  | Fluorescence enhancement                 | RSC Adv., <b>2020</b> , 10, 25848–25855              | THF:H <sub>2</sub> O (3:7)               | Phosphorylation, ICT               | 106 mM |

|                                                                                     |                                               |                                                               |                                                                           |                            |           |
|-------------------------------------------------------------------------------------|-----------------------------------------------|---------------------------------------------------------------|---------------------------------------------------------------------------|----------------------------|-----------|
| 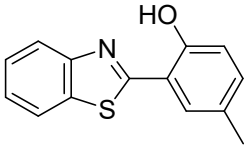   | Fluorescence enhancement                      | Sensors & Actuators: B. Chemical<br><b>2020</b> , 319, 128282 | CH <sub>3</sub> CN                                                        | Phosphorylation, ES IPT    | 0.186 μM. |
|    | Fluorescence enhancement                      | Anal. Chem.<br><b>2019</b> , 91, 12070–12076                  | CHCl <sub>3</sub>                                                         | Phosphamide formation      | 88 nM     |
|    | Fluorescence enhancement, Inhibition of PET   | Dyes and Pigments<br><b>2019</b> , 170, 107585                | CH <sub>3</sub> CN-H <sub>2</sub> O (4:6 v/v, 10mM HEPES buffer, pH 7.4)  | Phosphamide formation      | 0.23 μM   |
|   | Ratiometric emission enhancement, ICT process | New J. Chem.,<br><b>2019</b> , 43, 8627-8633                  | CHCl <sub>3</sub>                                                         | Phosphamide formation, ICT | 93.8 nM   |
|  | Quenching of fluorescence                     | Analytical Chemistry<br><b>2019</b> , 91, 17, 10927-10931     | Water                                                                     | Phosphamide formation,     | 0.15 ppb  |
|  | Quenching of fluorescence                     | New J. Chem.,<br><b>2018</b> , 42, 8756-8764                  | MeOH                                                                      | Phosphorylation            | 6.88 μM   |
|  | Fluorescence on and enhancement               | Analyst,<br><b>2018</b> , 143, 4171-4179                      | CH <sub>3</sub> CN-H <sub>2</sub> O (10 mM HEPES buffer, 7:3 V/V, pH 7.4) | Phosphorylation            | 0.20 μM   |

|                                                                                     |                                                           |                                                   |                                                                               |                              |          |
|-------------------------------------------------------------------------------------|-----------------------------------------------------------|---------------------------------------------------|-------------------------------------------------------------------------------|------------------------------|----------|
| 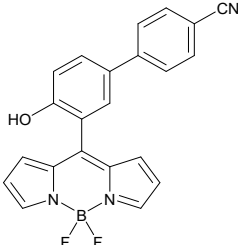   | Fluorescence colour change and enhancement                | Sensors and Actuators B <b>2018</b> , 255176–182  | DMF                                                                           | Phosphorylation              | 1.87 ppb |
|    | Quenching of fluorescence                                 | Sensors and Actuators B <b>2017</b> , 242,977–982 | CH <sub>3</sub> CN                                                            | Phosphamide formation        | 0.2 mM.  |
|    | Dual emission intensities, emission Shift and enhancement | Org. Biomol. Chem., <b>2017</b> , 15, 5959–5967   | CH <sub>3</sub> CN–H <sub>2</sub> O (10.0 mM HEPES buffer, 1 : 1 v/v, pH 7.4) | Phosphorylation              | 18.86 nM |
|  | Enhancement in fluorescence intensity, PET process        | New J. Chem., <b>2017</b> , 41, 1653-1658         | CHCl <sub>3</sub>                                                             | Phosphorylation, cyclization | 44 nM    |
|  | Fluorescence enhancement and blue shift                   | New J. Chem., <b>2017</b> , 41, 6661-6666         | DMSO (with 1% Et <sub>3</sub> N)                                              | Phosphorylation,             | 1.6 μM   |

|                                                                                                                                   |                                                |                                           |                                           |                                        |         |
|-----------------------------------------------------------------------------------------------------------------------------------|------------------------------------------------|-------------------------------------------|-------------------------------------------|----------------------------------------|---------|
| 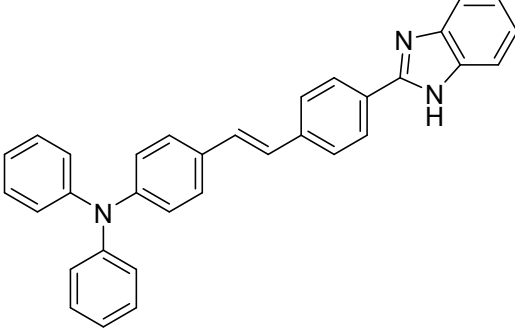                                                 | Fluorescence colour change and ICT enhancement | New J. Chem., <b>2017</b> ,41, 12562-1256 | THF/H <sub>2</sub> O (4/1, v/v)           | Phosphamide formation                  | 84.5 nM |
| <p style="text-align: center;">Present work</p>  | Fluorescence colour change via ESIPT process   | --                                        | CH <sub>3</sub> CN–H <sub>2</sub> O (1:1) | Phosphorylation followed by hydrolysis | 0.43 μM |

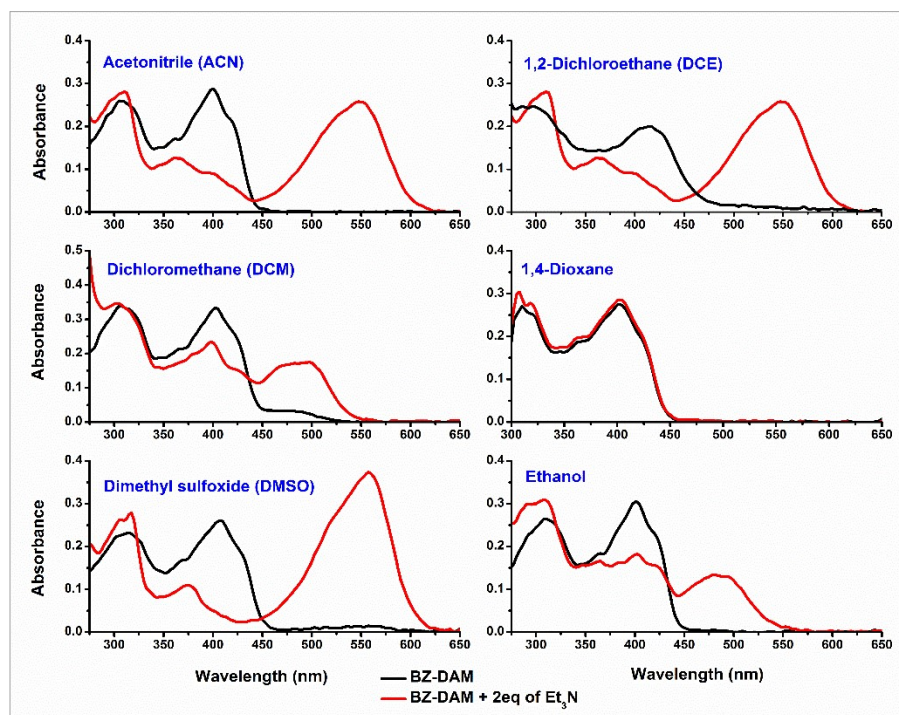

**Figure S6.** Absorption spectrum of BZ-DAM (20 μM) in solvents of varying polarity, in absence and in presence of 2eq of Triethylamine.



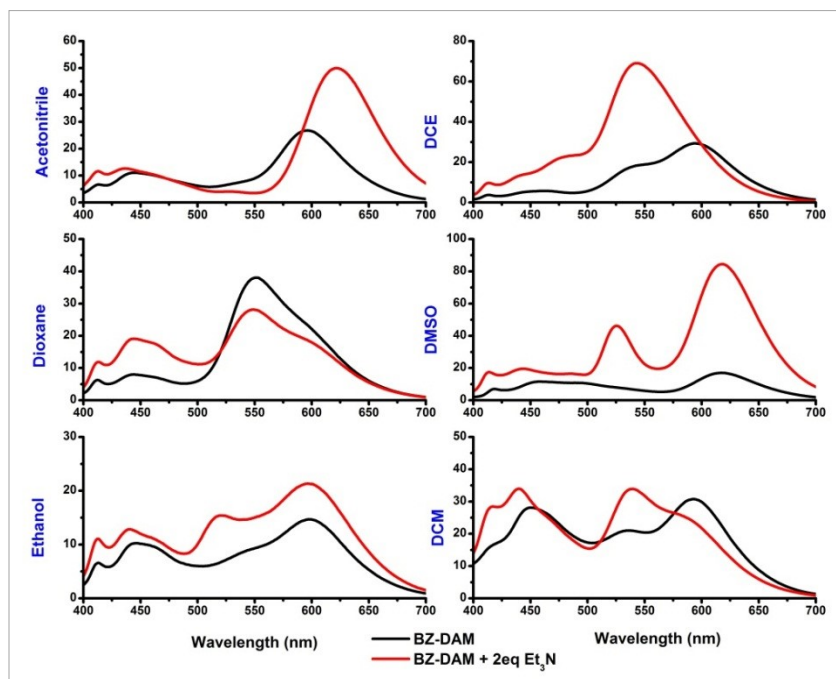

**Figure S7.** Normalized fluorescence spectrum of BZ-DAM (20  $\mu\text{M}$ ) in solvents of varying polarity, in absence and in presence of 2eq of Triethylamine.

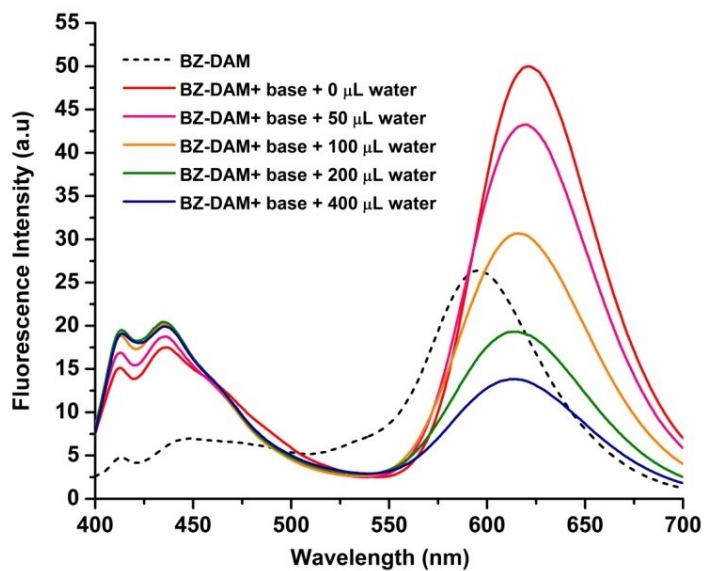

**Figure S8:** Fluorescence emission spectra of BZ-DAM (20  $\mu\text{M}$ ) in acetonitrile/water medium in presence of 4 eq. of Triethylamine.

**Table S2:** Summary of the lifetime of BZ-DAM in absence and in presence of DCP in (1:1) ACN:Water medium.

| Species    | $\tau_1$ (ns) | B <sub>1</sub> | $\tau_2$ (ns) | B <sub>2</sub> | $\tau_3$ (ns) | B <sub>3</sub> | $\chi^2$ | $\tau_{avg}$ |
|------------|---------------|----------------|---------------|----------------|---------------|----------------|----------|--------------|
| L @540     | 1.5           | 0.07           | 5.34          | 0.42           | 0.18          | 0.51           | 1.04     | 0.33         |
| L @600     | 0.16          | 0.83           | 0.38          | 0.17           | -             | -              | 0.98     | 0.17         |
| L @625     | -             | -              | -             | -              | -             | -              | -        | -            |
| L+DCP @540 | 1.88          | 0.08           | 3.75          | 0.92           | -             | -              | 1.03     | 3.46         |
| L+DCP @600 | 0.23          | 0.11           | 3.58          | 0.89           | -             | -              | 1.07     | 1.40         |
| L+DCP @625 | 0.87          | 0.04           | 3.67          | 0.78           | 0.18          | 0.17           | 1.12     | 0.83         |

**Table S3:** Shift of proton in <sup>1</sup>H NMR titration of BZ-DAM in presence of DCP in DMSO-*d*<sub>6</sub>

| Proton | Lig              | 0.5eq            | 1eq              | 1.5eq            | 2eq         |
|--------|------------------|------------------|------------------|------------------|-------------|
| a      | 12.73            | -                | -                | -                | -           |
| b      | -                | 10.34            | 10.30            | 10.29            | 10.27       |
| c      | <b>8.66</b>      | <b>8.65</b>      | <b>8.62</b>      | <b>8.63</b>      | <b>8.59</b> |
| d      | 8.2-8.18         | 8.21-8.18        | 8.17-.15         | 8.17-8.14        | 8.15-8.12   |
| e      | <b>8.15-8.14</b> | <b>8.15</b>      | <b>8.12-8.11</b> | <b>8.12-8.11</b> | <b>8.08</b> |
| f      | 8.12-8.09        | 8.11-8.09        | 8.08-8.06        | 8.09-8.06        | 8.06-8.04   |
| g      | 8.06             | -                | -                | -                | -           |
| h      | <b>7.93-7.92</b> | <b>7.92-7.93</b> | <b>7.88-7.87</b> | <b>7.89</b>      | <b>7.84</b> |
| i      | 7.62-7.57        | 7.62-7.57        | 7.60-7.55        | 7.61-7.56        | 7.59-7.54   |
| J      | 7.54-7.49        | 7.53-7.48        | 7.52-7.46        | 7.52-7.47        | 7.51-7.45   |
| k      | -                | -                | 7.70-7.69        | 7.72             | 7.69-7.68   |
| l      | <b>2.38</b>      | <b>2.38</b>      | <b>2.35</b>      | <b>2.35</b>      | <b>2.33</b> |

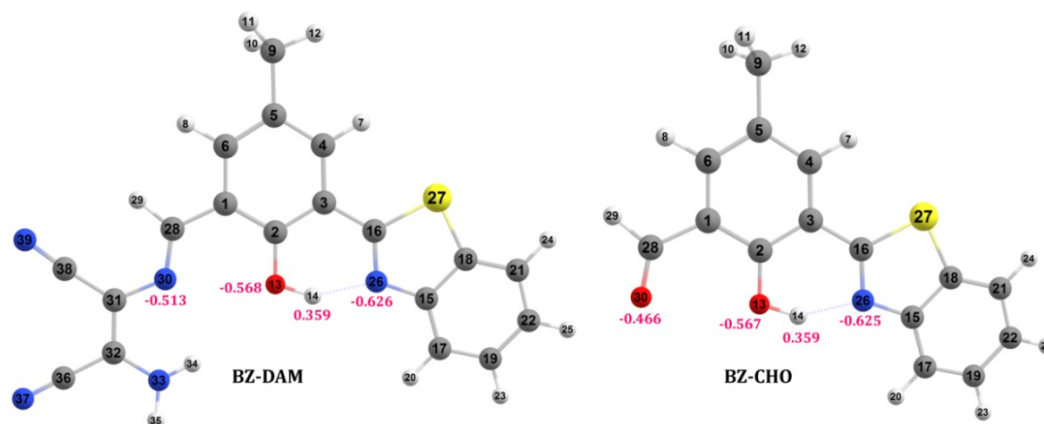

**Figure S9:** Geometry optimised structure of (a) BZ-DAM and (b) BZ-CHO at B3LYP/6-31G(d,p) level of theory. Mulliken charge density of the atoms involved in ES IPT process is written over the respective atom.

**Table S4:** Summary of the TDDFT electron transitions of keto and enol form of BZ-DAM and BZ-CHO at B3LYP/6-31G (d,p) level of theory.

| Compound      |                | Transitions corresponding to First excited state | $\Delta E$ (eV) between the orbitals | Normalized Coefficient (x)      | Wavelength (nm) From TDDFT calculations | $f_{osc}$     | Experimental wavelength (nm) |
|---------------|----------------|--------------------------------------------------|--------------------------------------|---------------------------------|-----------------------------------------|---------------|------------------------------|
| <b>BZ-DAM</b> | Enol-GS        | HOMO-1→LUMO<br>HOMO→LUMO<br>HOMO→LUMO+1          | 3.71<br>3.37<br>3.94                 | 0.29475<br>0.61922<br>-0.15494  | 414.57 nm                               | 0.4825        | 400                          |
|               | Enol-EX        | HOMO-1→LUMO<br>HOMO→LUMO<br>HOMO→LUMO+1          | 3.50<br>2.86<br>3.54                 | -0.15323<br>0.67710<br>-0.11966 | 497.63 nm                               | 0.8678        | 450                          |
|               | <b>Keto-EX</b> | <b>HOMO→LUMO</b>                                 | <b>2.49</b>                          | <b>-0.69999</b>                 | <b>613.02 nm</b>                        | <b>0.7528</b> | <b>595</b>                   |
|               | Keto-GS        | HOMO→LUMO                                        | 2.94                                 | 0.69588                         | 494.08 nm                               | 0.6041        | -----                        |
| <b>BZ-CHO</b> | Enol-GS        | HOMO→LUMO                                        | 4.00                                 | 0.69195                         | 358.36 nm                               | 0.4401        | 366                          |
|               | Enol-EX        | HOMO→LUMO                                        | 3.56                                 | 0.70048                         | 415.83 nm                               | 0.7354        | 458                          |
|               | <b>Keto-EX</b> | <b>HOMO→LUMO</b>                                 | <b>2.96</b>                          | <b>0.70509</b>                  | <b>512.95 nm</b>                        | <b>0.5819</b> | <b>540</b>                   |
|               | Keto-GS        | HOMO→LUMO                                        | 3.33                                 | 0.70378                         | 430.25 nm                               | 0.4854        | -----                        |

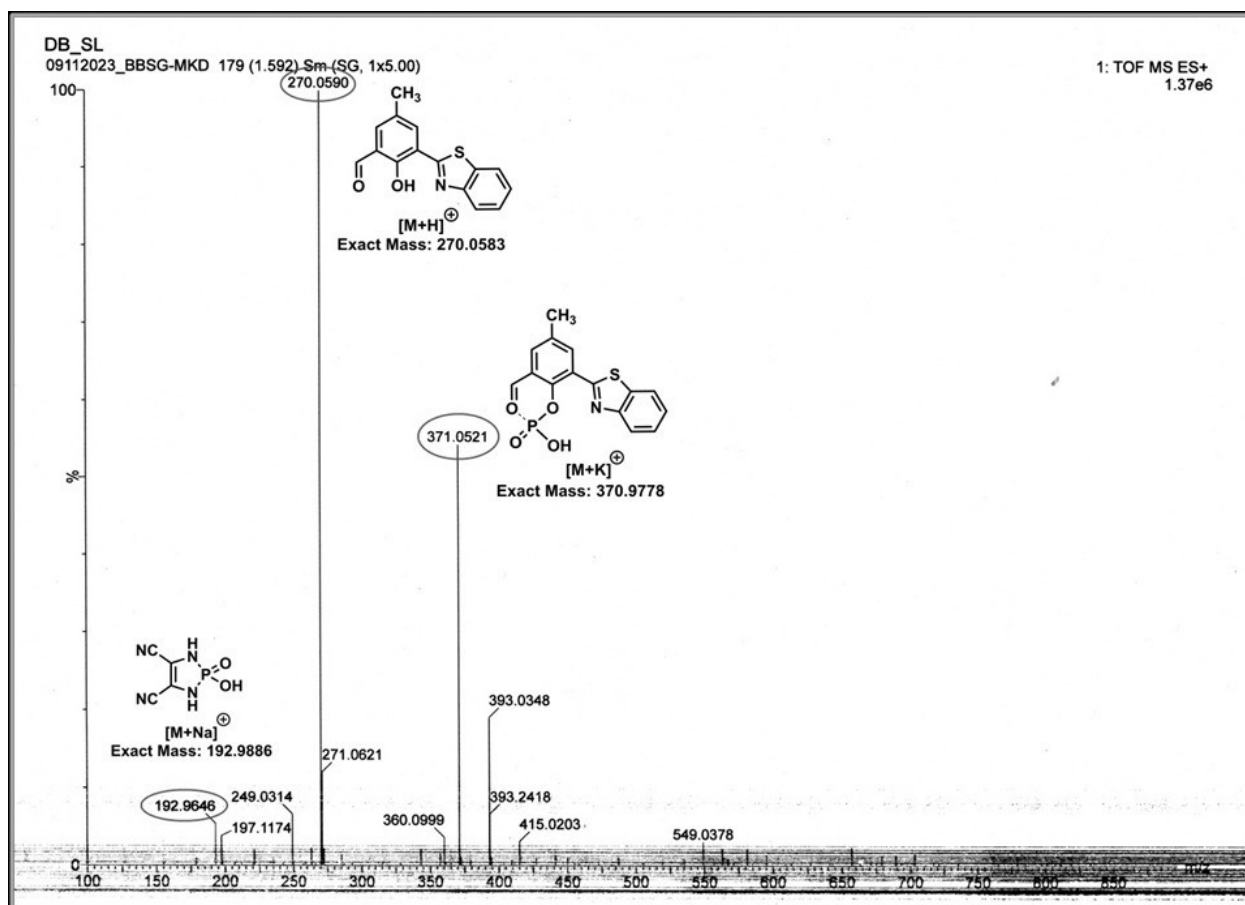

**Figure S10:** ESI-MS of compound **BZ-DAM** in presence of DCP

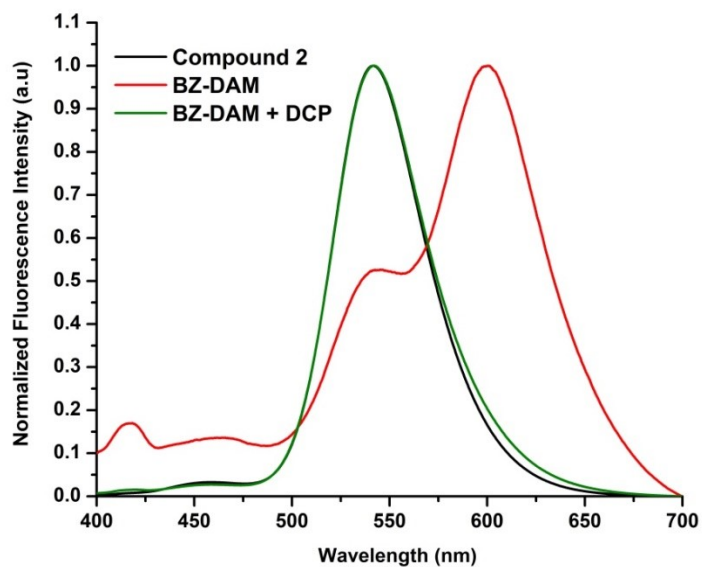

**Figure S11:** Comparison of Fluorescence emission spectra between Compound of BZ-CHO and BZ-DAM (20  $\mu$ M) in (1:1) acetonitrile/water medium

**Table S5: MTT assay data**

| Conc (ug/ml) | 0              | 10             | 20             | 30             | 40             | 50             | 60             | 70             | 80             | 90             | 100            |
|--------------|----------------|----------------|----------------|----------------|----------------|----------------|----------------|----------------|----------------|----------------|----------------|
| Abs 1        | 1.1878         | 0.6844         | 0.5056         | 0.6876         | 0.5616         | 0.586          | 0.3354         | 0.2536         | 0.344          | 0.4894         | 0.3284         |
| Abs 2        | 0.8768         | 0.6718         | 0.5754         | 0.4832         | 0.4472         | 0.3724         | 0.485          | 0.2944         | 0.4628         | 0.4266         | 0.4308         |
| Abs 3        | 0.4854         | 0.9302         | 0.5494         | 0.5974         | 0.4946         | 0.3928         | 0.3654         | 0.4762         | 0.4336         | 0.4162         | 0.341          |
| <b>Mean</b>  | <b>0.85</b>    | <b>0.76213</b> | <b>0.54347</b> | <b>0.5894</b>  | <b>0.50113</b> | <b>0.4504</b>  | <b>0.39527</b> | <b>0.3414</b>  | <b>0.41347</b> | <b>0.44407</b> | <b>0.36673</b> |
| <b>SD</b>    | <b>0.35197</b> | <b>0.14569</b> | <b>0.03528</b> | <b>0.10243</b> | <b>0.05748</b> | <b>0.11788</b> | <b>0.07915</b> | <b>0.11851</b> | <b>0.06191</b> | <b>0.0396</b>  | <b>0.05584</b> |

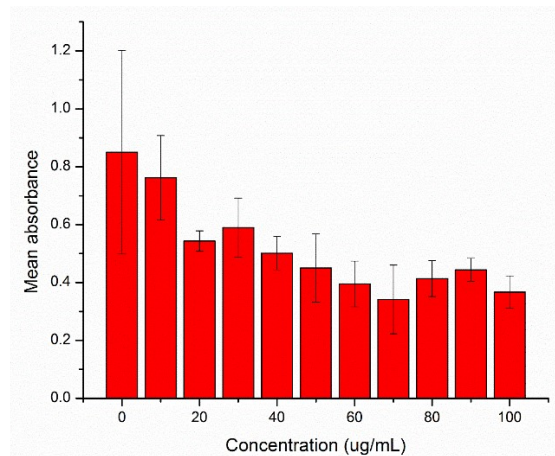

**Figure S12: MTT assay bar diagram.**

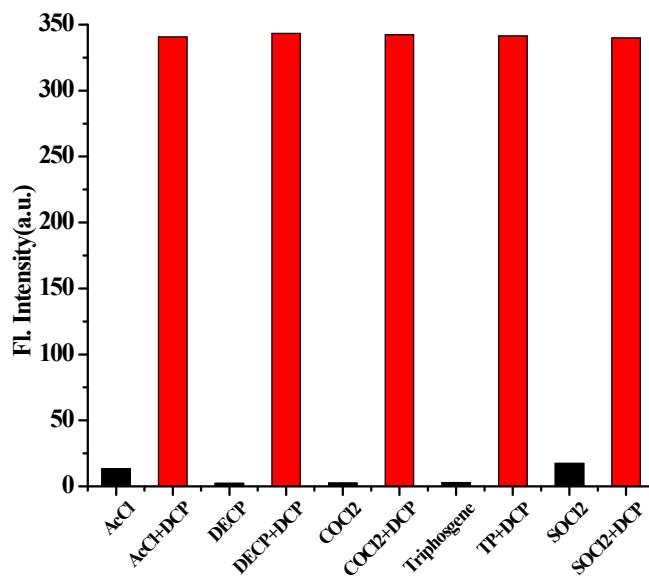

**Figure S13: Change of emission intensity of BZ-DAM with DCP in presence of various analytes at 540 nm, in CH<sub>3</sub>CN-H<sub>2</sub>O (1:1) solution ( $\lambda_{ex}$  = 365 nm) at 25 °C.**

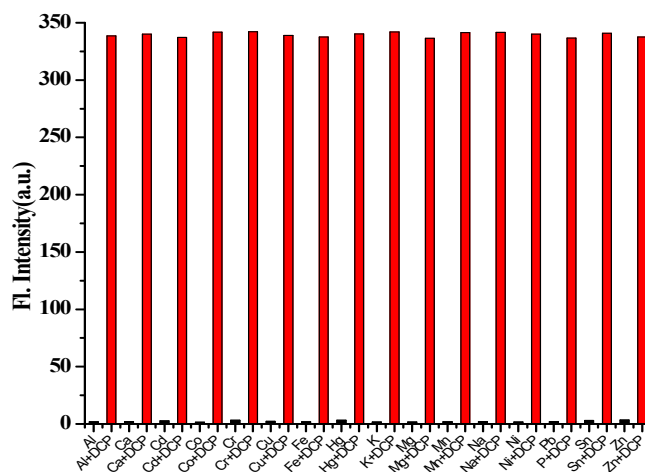

**Figure S14:** Change of emission intensity of BZ-DAM with DCP in presence of cations at 540 nm, in  $\text{CH}_3\text{CN-H}_2\text{O}$  (1:1) solution ( $\lambda_{\text{ex}} = 365 \text{ nm}$ ) at  $25^\circ\text{C}$ .

In this mechanistic path, the phenol group in BZ-DAM is first phosphoesterified by DCP, which assists the formation of a significant 6-membered cyclic intermediate by the nucleophilic attack of a water molecule at the aldimine carbon atom and then followed by stepwise dephosphorylation to assist the complete hydrolysis of aldimine of BZ-DAM. The mechanism is supported by the mass spectra of the compound in presence of DCP.

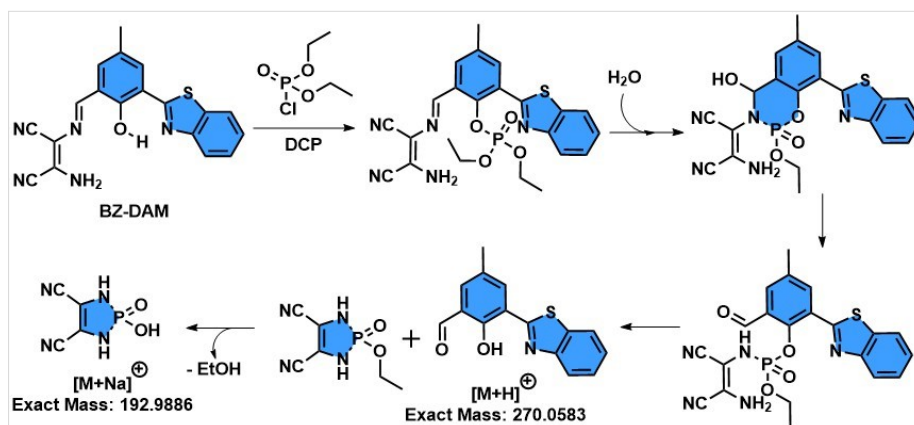

**Figure S15:** Plausible mechanism of hydrolysis of BZ-DAM (Aldimine) in presence of DCP in  $\text{CH}_3\text{CN-H}_2\text{O}$  (1:1) solution at  $25^\circ\text{C}$ .

Here, initially both the ESPT and ICT mechanisms are operative in the BZ-DAM. Thus, we can see two fluorescence bands: one at  $\sim 540 \text{ nm}$  at another at  $\sim 600 \text{ nm}$ . The red-shifted band ( $\sim 600 \text{ nm}$ ) can be ascribed to the ESPT-assisted ICT which can facilitate the delocalization of electrons on the DAM group.

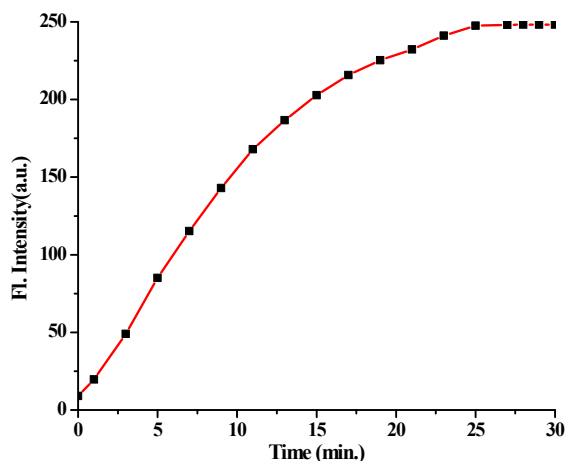

**Figure S16:** Changes in fluorescence intensity BZ-DAM with time in presence of DCP.

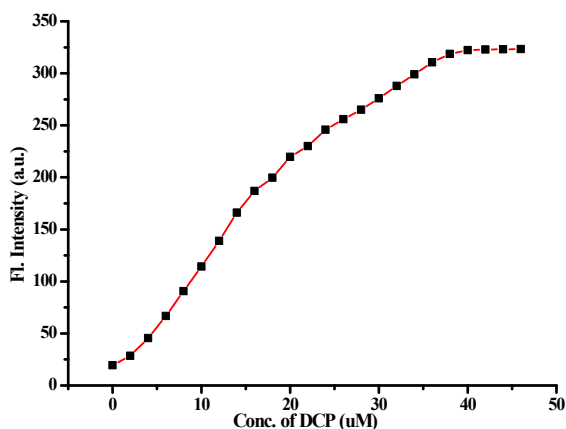

**Figure S17:** Changes in fluorescence intensity BZ-DAM of in presence of DCP at different concentration.

#### Determination of Detection Limit:

The detection limit (DL) of BZ-DAM for DCP was determined from the following equation<sup>1</sup>:

$$DL = K \cdot S_{b1} / S$$

Where K = 2 or 3 (we take 3 in this case);  $S_{b1}$  is the standard deviation of the blank solution; S is the slope of the calibration curve.

From the graph we get slope = 7.3991, and  $S_{b1}$  value is 1.068699.

Thus, using the formula, we get the Detection Limit = 0.433  $\mu\text{M}$  i.e., BZ-DAM can detect DCP in this minimum concentration.

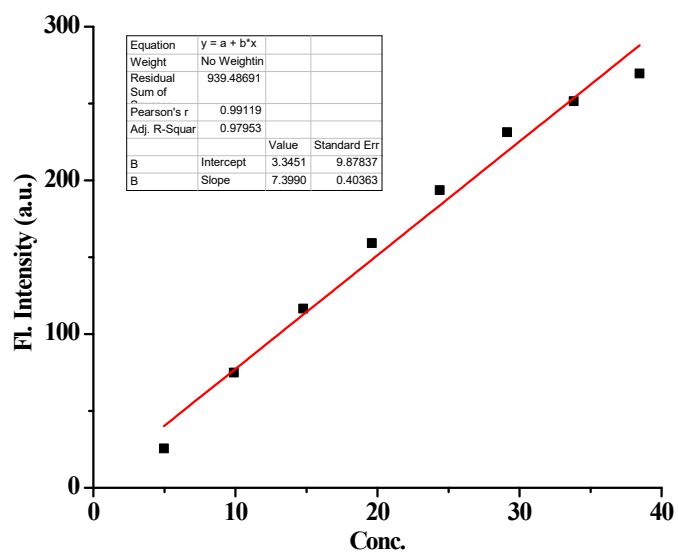

**Figure S18:** Linear fit plot of LOD calculation of BZ-DAM with DCP.

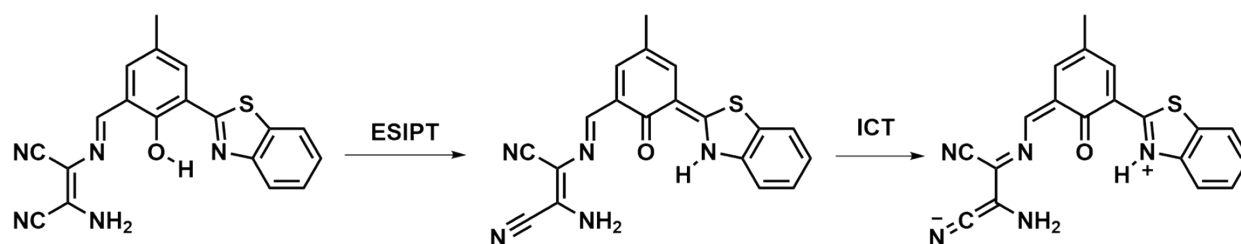

**Figure S19:** Mechanistic path of ES IPT assisted ICT process.

## References:

1. Zhu, M.; Yuan, M.; Liu, X.; Xu, J.; Lv, J.; Huang, C.; Liu, H.; Li, Y.; Wang, S.; Zhu, D. *Org.Lett.* **2008**, *10*, 1481-1484.
